# Supplementary material for: Manufacture of CD22 CAR T cells following positive versus negative selection results in distinct cytokine secretion profiles and γδ T cell output
Source: PubMed Central journal article supplement — Mol Ther Methods Clin Dev. 2023 Dec 11;32(1):101171. doi: 10.1016/j.omtm.2023.101171 (PMC10827561; doi:10.1016/j.omtm.2023.101171), 2023-12-11
Supplement: mmc1.pdf [file mmc1.pdf]

## Supplemental information

### **Manufacture of CD22 CAR T cells following positive versus negative selection results in distinct cytokine secretion profiles and $\gamma\delta$ T cell output**

**Hannah W. Song, Mehdi Benzaoui, Alka Dwivedi, Sarah Underwood, Lipei Shao, Sooraj Achar, Vesna Posarac, Victoria A. Remley, Michaela Prochazkova, Yihua Cai, Ping Jin, Robert P. Somerville, David F. Stroncek, Grégoire Altan-Bonnet, Nirali N. Shah, Christopher D. Chien, Naomi Taylor, and Steven L. Highfill**

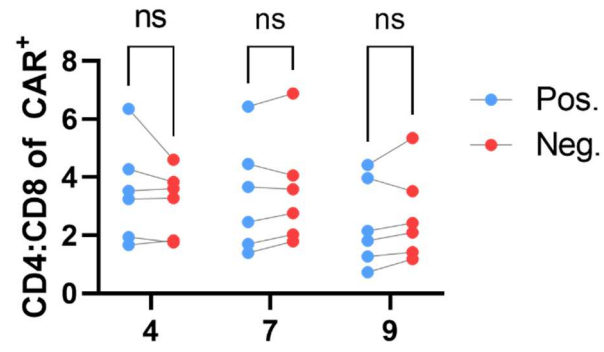

**Figure S1: CD4:CD8 ratio in CAR<sup>+</sup> T cells.** The ratio of CD4:CD8 cells was assessed after gating on viable CD3<sup>+</sup>CAR<sup>+</sup> cells at days 4, 7, and 9 following positive and negative selection. ns, non-significant

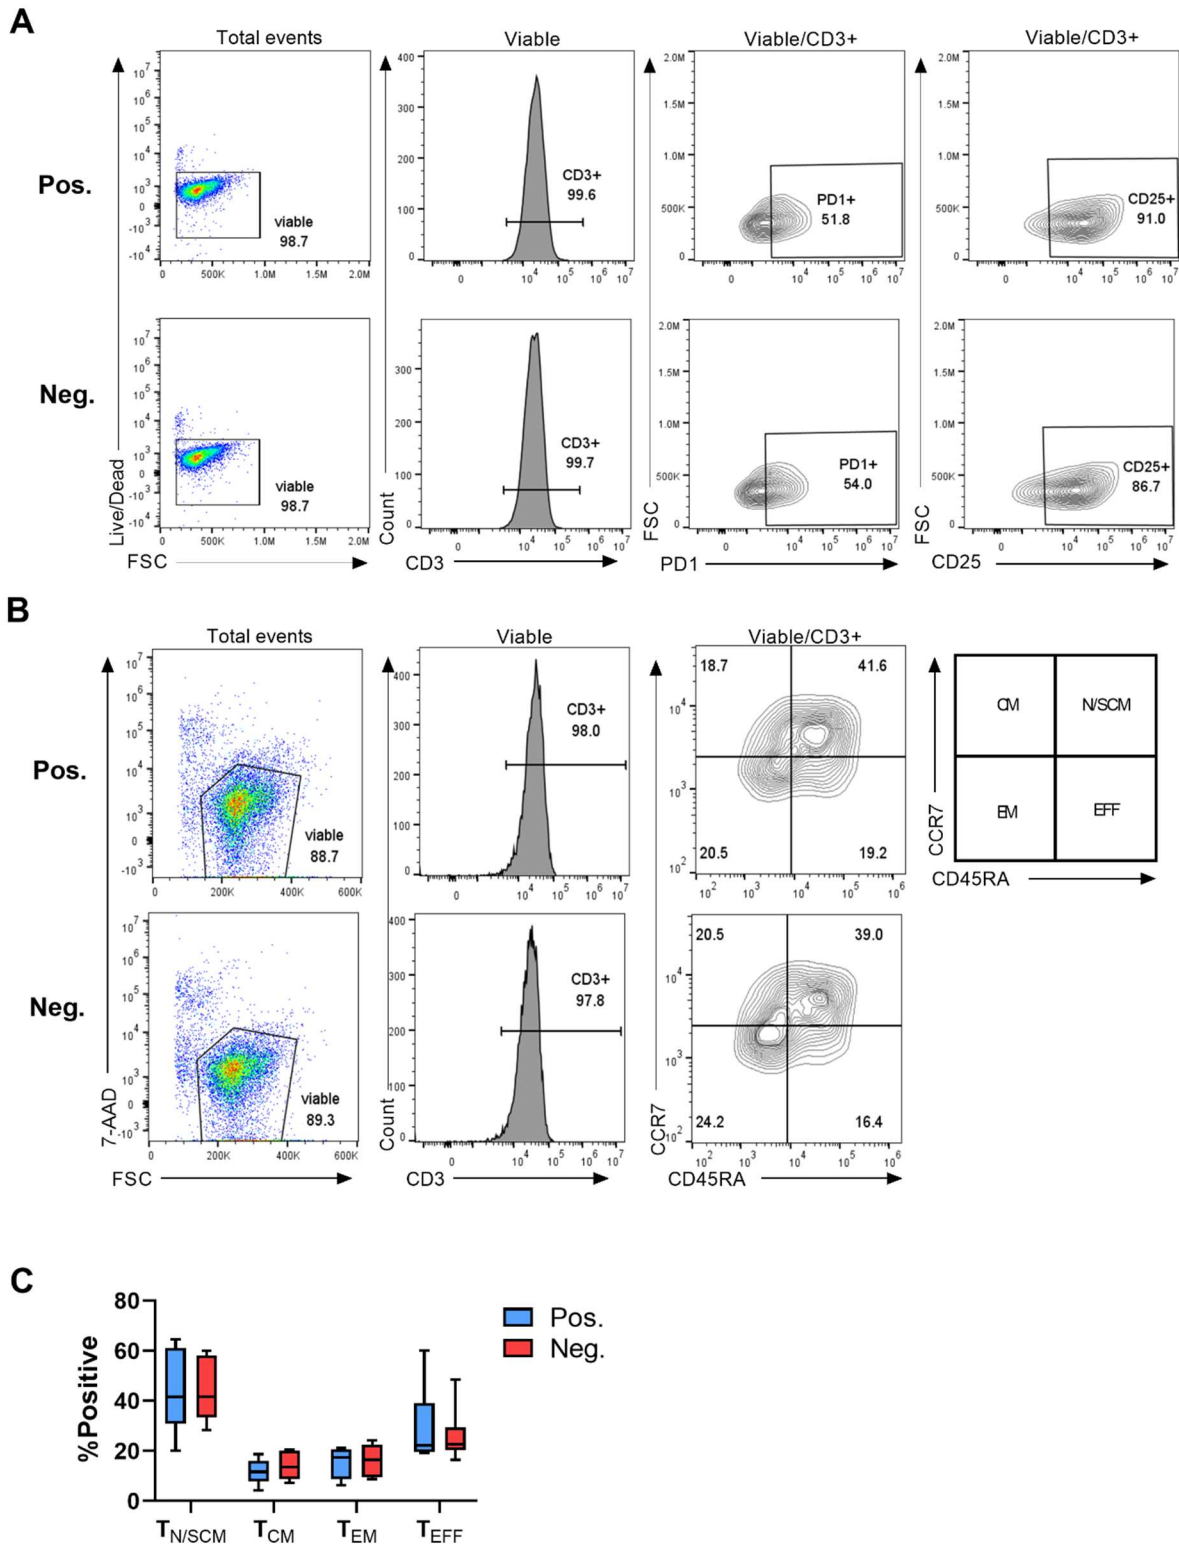

**Figure S2: Representative flow cytometry plots assessing T cell phenotype and activation markers. (A)** Representative plots showing the gating of PD-1 and CD25 activation markers on CD3<sup>+</sup> T cells at day 9. **(B)** Representative plots showing CD45RA/CCR7 profiles distinguishing naïve/stem cell memory-like (N/SCM), central memory (CM), effector (E), and terminal effector (EFF) T cells at day 9. **(C)** The percentages of each subset were evaluated on gated CD3<sup>+</sup> T cells at Day 9 and means  $\pm$  SEM (N=6) are shown.

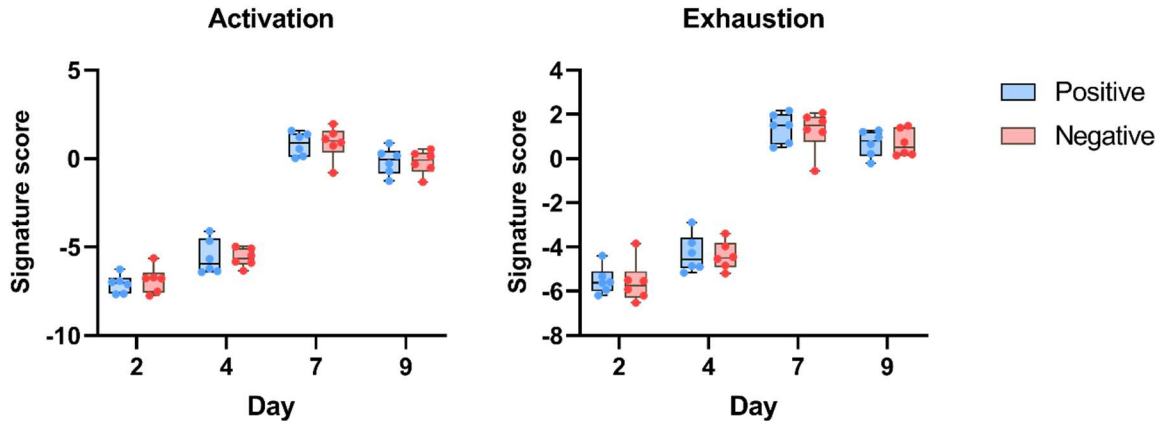

**Figure S3: Signature scores of activation and cytotoxicity pathways on negatively-selected and positively-selected T cells.** Pathway analysis of gene expression data for activation and cytotoxicity pathways were assessed at days 2, 4, 7, and 9 of culture. Means  $\pm$  SEM (n=6 donors) are shown.

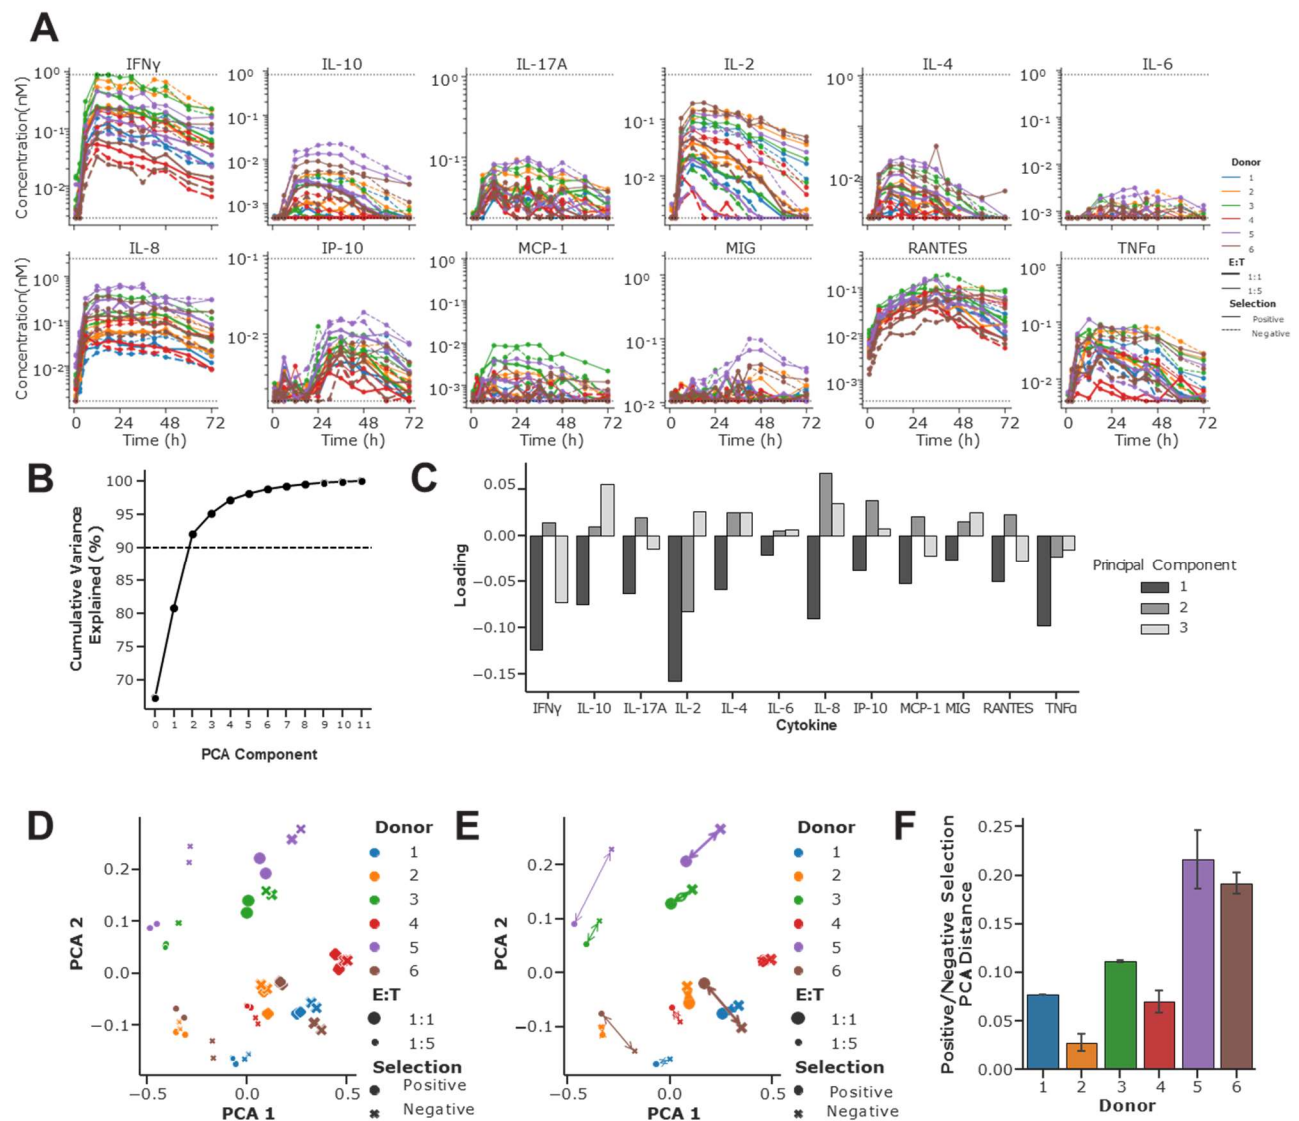

**Figure S4. Dynamics of cytokine secretion by CD22 CART<sup>pos</sup> and CART<sup>neg</sup> in response to NALM6 leukemia.** (A) Cytokine secretion by CD22 CART generated from 6 donors was evaluated following co-culture with NALM6 at a 1:1 effector/target (E:T) ratio. Cytokines were monitored at 1, 3, 6, 12, 18, 24, 30, 36, 42, 48, 60, and 72h timepoints on a TECAN EVO 100 robotic system. Raw Immunotron cytokine trajectories are shown; dotted lines represent the upper and lower limits of detection for each cytokine. (B) Cumulative variance explained for PCA on average cytokine secretion levels per sample; 3 components are sufficient to reach ~90% variance explained. (C) Loadings for the first 3 PCA components. (D) PCA1/PCA2 profiles of each sample following co-culture with NALM6 leukemia at a 1:1 and 1:5 E/T ratio. (E) Distances between positive and negative selections for each set of samples in PCA space. (F) PCA distances show considerable heterogeneity between donors, signifying that positive and negative selection had a greater impact on the cytokine secretion of cells derived from some donors over others.

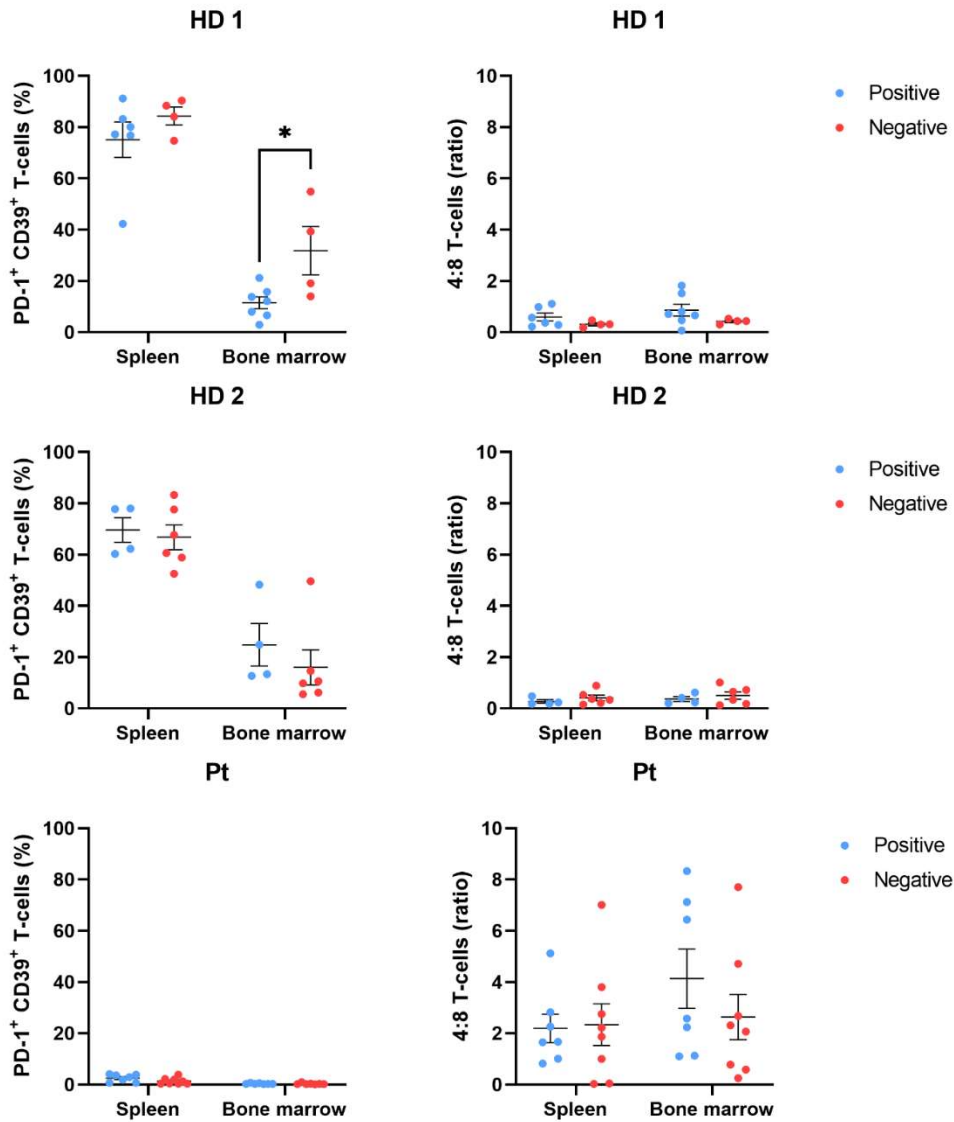

**Figure S5. CD4/CD8 ratios and the PD1<sup>+</sup>CD39<sup>+</sup> phenotype of CD22 CART persisting in NALM6-bearing NSG mice vary as a function of donor.** Following adoptive transfer of CD22 CART<sup>pos</sup> and CART<sup>neg</sup> from 3 donors (HD1, HD2, and Pt) into NSG mice with NALM6 leukemia, mice were sacrificed (day 10) and the phenotypes of human T cells in spleen and bone marrow were evaluated. The percentages of PD1<sup>+</sup>CD39<sup>+</sup> T cells and their CD4/CD8 profiles were monitored by flow cytometry and a quantification of these cells are shown for each donor (n=4-7 mice per group).

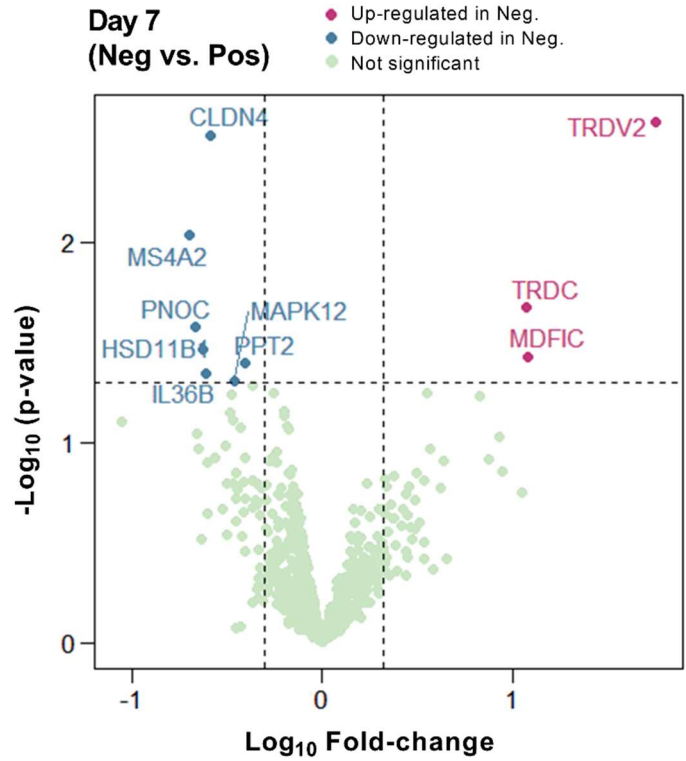

**Figure S6. Differential gene expression in CD22 CART<sup>pos</sup> and CART<sup>neg</sup>.** Volcano plot representation of differential gene expression between CD22 CART<sup>pos</sup> and CART<sup>neg</sup> (day 7 of expansion). Fold changes of >2 and p<0.05 were considered significant (dotted lines). The identities of several differentially expressed transcripts are indicated.

**Table S1: Flow cytometry reagents.**

| <b>Marker</b>     | <b>Conjugate</b>                           | <b>Catalog #</b>     | <b>Clone</b> | <b>Dilution</b> |
|-------------------|--------------------------------------------|----------------------|--------------|-----------------|
| CCR7              | FITC                                       | BD 561271            | 150503       | 1:100           |
| CD3               | APC-H7                                     | BD 641397            | SK7          | 1:100           |
| CD3               | BV650                                      | BD 563999            | SK7          | 1:100           |
| CD4               | BV605                                      | BD 562658            | RPA-T4       | 1:100           |
| CD4               | AF-700                                     | BD 557922            | RPA-T4       | 1:100           |
| CD4               | PerCP                                      | BD 344624            | SK3          | 1:100           |
| CD8               | FITC                                       | BD 347313            | SK1          | 1:100           |
| CD8               | BV-510                                     | BD 563919            | SK1          | 1:100           |
| CD8               | BV605                                      | BD 300936            | HIT8a        | 1:100           |
| CD25              | PE-Cy7                                     | BD 557741            | M-A251       | 1:100           |
| CD45RA            | BV421                                      | BD 562885            | HI100        | 1:100           |
| CD45RO            | BV605                                      | BD 562791            | UCHL1        | 1:100           |
| CD62L             | PE-Cy7                                     | BD 565535            | DREG56       | 1:100           |
| LAG3              | APC-R700                                   | BD 565774            | T47-530      | 1:100           |
| PD-1              | BV421                                      | BD 562516            | EH12.1       | 1:100           |
| Protein L         | Biotin                                     | Pierce 29997         | n/a          | 20:100          |
| Streptavidin      | FITC                                       | Invitrogen S32354    | n/a          | 1:100           |
| TCR $\alpha\beta$ | PE                                         | Miltenyi 130-113-537 | REA652       | 1:100           |
| TCRV $\delta$ 1   | APC                                        | Miltenyi 130-118-968 | REA173       | 1:100           |
| TCRV $\delta$ 2   | BV421                                      | Miltenyi 130-111-015 | REA771       | 1:100           |
| Viability         | Fixable Aqua Dead Cell Stain               | Agilent L34966       | n/a          | 1:100           |
| Viability         | LIVE/DEAD™ Fixable Near-IR Dead Cell Stain | Biologend L34976A    | n/a          | 1:100           |
| Viability         | 7-AAD                                      | BD 559925            | n/a          | 3:100           |
